# Supplementary material for: What should medical students be taught about abortion? An evaluation of student attitudes towards their abortion teaching and their future involvement in abortion care
Source: PubMed Central journal article supplement (PMC7784357; doi:10.1186/s12909-020-02414-9), 2021-01-04
Supplement: 12909_2020_2414_MOESM1_ESM.pdf [file 12909_2020_2414_MOESM1_ESM.pdf]

## Abortion Education at UCL Medical School: Anonymous Research Survey

This survey asks about your knowledge and opinions on abortion care and abortion education at UCLMS.

There are no right or wrong answers; the survey is entirely anonymous. Please answer as honestly as you can.

### Your knowledge of abortion care

1. In general, how good or poor is your knowledge about the following topics?

|                                                                                     | <i>Very poor</i> | <i>Somewhat poor</i> | <i>Neither poor nor good</i> | <i>Somewhat good</i> | <i>Very good</i> |
|-------------------------------------------------------------------------------------|------------------|----------------------|------------------------------|----------------------|------------------|
| UK law on abortion.                                                                 |                  |                      |                              |                      |                  |
| Doctors' legal and professional right to opt out of providing abortion care.        |                  |                      |                              |                      |                  |
| Conducting a pregnancy options consultation.                                        |                  |                      |                              |                      |                  |
| How to respectfully opt out of abortion care.                                       |                  |                      |                              |                      |                  |
| Identifying women who may need counselling before making a decision about abortion. |                  |                      |                              |                      |                  |
| Supporting women to make a decision about abortion.                                 |                  |                      |                              |                      |                  |
| Referring to an abortion provider.                                                  |                  |                      |                              |                      |                  |
| Completing a HSA1 (abortion) form.                                                  |                  |                      |                              |                      |                  |
| What surgical abortion (vacuum aspiration) entails.                                 |                  |                      |                              |                      |                  |
| What surgical abortion (dilatation and evacuation) entails.                         |                  |                      |                              |                      |                  |
| What early (<10 weeks gestation) medical abortion entails.                          |                  |                      |                              |                      |                  |
| What late (>10 weeks gestation) medical abortion entails.                           |                  |                      |                              |                      |                  |
| What the main abortion-related complications /risks are.                            |                  |                      |                              |                      |                  |
| Why women seek abortions.                                                           |                  |                      |                              |                      |                  |

Moral arguments for and against abortion.

|  |  |  |  |  |  |
|--|--|--|--|--|--|
|  |  |  |  |  |  |
|--|--|--|--|--|--|

Your teaching on abortion at UCL Medical School

3. At UCLMS have you had a voluntary placement in an abortion assessment clinic? (please circle)

No / Yes

If YES to Q3, How much do you agree or disagree that your experience helped you...

|                                                                   | <i>Strongly Disagree</i> | <i>Disagree</i> | <i>Neither agree nor disagree</i> | <i>Agree</i> | <i>Strongly Agree</i> |
|-------------------------------------------------------------------|--------------------------|-----------------|-----------------------------------|--------------|-----------------------|
| ...understand how abortion assessment consultations are conducted |                          |                 |                                   |              |                       |
| ...understand why women seek abortions                            |                          |                 |                                   |              |                       |
| ...think more clearly about my own involvement in abortion care   |                          |                 |                                   |              |                       |

If NO to Q3, why did you not take part in an abortion assessment clinical placement? (please tick all that apply)

I didn't think it would be useful

I have a conscientious objection to abortion

I didn't know about the placements

I wanted to but there were no placements available

I booked a placement but it was cancelled by the clinic

I booked a placement but I had to cancel it

Other (please write):

---

4. Have you received any clinical teaching on abortion outside of Year 2 and Year 5 Ethics and Law teaching, within your clinical placements? (please circle) No / Yes

If YES, please specify which aspects of abortion care which were covered:

5. Do you think placements in abortion assessment clinics should be optional or compulsory at medical school? (please circle one answer): Compulsory / Optional / Uncertain

Please feel free to outline any reasons for your response:

6. How much do you agree or disagree with the following statement?

|                                                                               | <i>Strongly disagree</i> | <i>Disagree</i> | <i>Neutral</i> | <i>Agree</i> | <i>Strongly Agree</i> |
|-------------------------------------------------------------------------------|--------------------------|-----------------|----------------|--------------|-----------------------|
| My UCL medical school education on abortion covered everything I need to know |                          |                 |                |              |                       |

7. How important do you think it is for medical students to learn about abortion care? (please circle ONE):

*Very unimportant / Somewhat unimportant / Neutral / Somewhat important / Very important*

8. What are your opinions about the amount of teaching on abortion UCLMS medical students have currently?

|                                                                                     | <i>Much too little</i> | <i>A bit too little</i> | <i>About right</i> | <i>A bit too much</i> | <i>Much too much</i> |
|-------------------------------------------------------------------------------------|------------------------|-------------------------|--------------------|-----------------------|----------------------|
| UK law on abortion.                                                                 |                        |                         |                    |                       |                      |
| Doctors' legal and professional right to opt out of providing abortion care.        |                        |                         |                    |                       |                      |
| Conducting a pregnancy options consultation.                                        |                        |                         |                    |                       |                      |
| How to respectfully opt out of abortion care.                                       |                        |                         |                    |                       |                      |
| Identifying women who may need counselling before making a decision about abortion. |                        |                         |                    |                       |                      |
| Supporting women to make a decision about abortion.                                 |                        |                         |                    |                       |                      |
| Referring to an abortion provider.                                                  |                        |                         |                    |                       |                      |
| Completing the HSA1 (abortion) form.                                                |                        |                         |                    |                       |                      |
| What surgical abortion (vacuum aspiration) entails.                                 |                        |                         |                    |                       |                      |
| What a surgical abortion (dilatation and evacuation) entails.                       |                        |                         |                    |                       |                      |

What early medical abortion (<10 weeks gestation) entails.

What late medical abortion (>10 weeks gestation) entails.

Abortion-related complications / risks.

Why women seek abortions.

Guest speaker: woman who has had an abortion.

Guest speaker: doctor with a conscientious objection to abortion.

Clinical exposure to abortion provision.

Moral arguments for and against abortion.

Other (please write): \_\_\_\_\_

|  |  |  |  |  |
|--|--|--|--|--|
|  |  |  |  |  |
|  |  |  |  |  |
|  |  |  |  |  |
|  |  |  |  |  |
|  |  |  |  |  |
|  |  |  |  |  |
|  |  |  |  |  |
|  |  |  |  |  |
|  |  |  |  |  |
|  |  |  |  |  |
|  |  |  |  |  |

Please comment on any other aspects of abortion care you think there should be more or less teaching on:

### Your views on abortion now and in the future

9. Do you personally think it is wrong or not wrong for a woman to have an abortion in the following circumstances?

|                                                                         | <i>Always wrong</i> | <i>Almost always wrong</i> | <i>Wrong only sometimes</i> | <i>Not wrong at all</i> | <i>Can't choose</i> |
|-------------------------------------------------------------------------|---------------------|----------------------------|-----------------------------|-------------------------|---------------------|
| If there is a strong chance of a serious defect in the baby             |                     |                            |                             |                         |                     |
| If the family has a very low income and cannot afford any more children |                     |                            |                             |                         |                     |

10. What is your overall attitude towards abortion?

Strongly pro-choice

Moderately pro-choice

|  |
|--|
|  |
|  |

Neither pro-choice nor pro-life

Moderately pro-life

Strongly pro-life

Undecided

Prefer not to say

|  |
|--|
|  |
|  |
|  |
|  |
|  |

11. In your future career as a doctor, would you be willing to be involved in the following aspects of abortion care (assuming that you had the relevant training and experience)?

| A). Abortions < 12 weeks gestation | <i>Yes, in any legally justifiable circumstances</i> | <i>Yes, but in specific circumstances only</i> | <i>No, under no circumstances</i> | <i>Uncertain</i> |
|------------------------------------|------------------------------------------------------|------------------------------------------------|-----------------------------------|------------------|
| Pregnancy options discussion       |                                                      |                                                |                                   |                  |
| Refer for an abortion              |                                                      |                                                |                                   |                  |
| Complete HSA1 (abortion) form      |                                                      |                                                |                                   |                  |
| Perform medical abortion           |                                                      |                                                |                                   |                  |
| Perform surgical abortion          |                                                      |                                                |                                   |                  |

| B). Abortions 12-24 weeks gestation | <i>Yes, in any legally justifiable circumstances</i> | <i>Yes, but in specific circumstances only</i> | <i>No, under no circumstances</i> | <i>Uncertain</i> |
|-------------------------------------|------------------------------------------------------|------------------------------------------------|-----------------------------------|------------------|
| Pregnancy options discussion        |                                                      |                                                |                                   |                  |
| Refer for an abortion               |                                                      |                                                |                                   |                  |
| Complete HSA1 (abortion) form       |                                                      |                                                |                                   |                  |
| Perform medical abortion            |                                                      |                                                |                                   |                  |
| Perform surgical abortion           |                                                      |                                                |                                   |                  |

| C). Abortions > 24 weeks gestation | <i>Yes, in any legally</i> | <i>Yes, but in specific</i> | <i>No, under no circumstances</i> | <i>Uncertain</i> |
|------------------------------------|----------------------------|-----------------------------|-----------------------------------|------------------|
|------------------------------------|----------------------------|-----------------------------|-----------------------------------|------------------|

|                               | <i>justifiable<br/>circumstances</i> | <i>circumstances<br/>only</i> |  |  |
|-------------------------------|--------------------------------------|-------------------------------|--|--|
| Pregnancy options discussion  |                                      |                               |  |  |
| Refer for an abortion         |                                      |                               |  |  |
| Complete HSA1 (abortion) form |                                      |                               |  |  |
| Perform medical abortion      |                                      |                               |  |  |
| Perform surgical abortion     |                                      |                               |  |  |

12. Which specialties are you considering for your future work? Please tick all that apply.

|                                   |                          |                      |                          |
|-----------------------------------|--------------------------|----------------------|--------------------------|
| <i>Anaesthetics</i>               | <input type="checkbox"/> | <i>Pathology</i>     | <input type="checkbox"/> |
| <i>Care of the Elderly</i>        | <input type="checkbox"/> | <i>Public Health</i> | <input type="checkbox"/> |
| <i>Emergency Medicine</i>         | <input type="checkbox"/> | <i>Psychiatry</i>    | <input type="checkbox"/> |
| <i>General Practice</i>           | <input type="checkbox"/> | <i>Radiology</i>     | <input type="checkbox"/> |
| <i>Medicine</i>                   | <input type="checkbox"/> | <i>Sexual Health</i> | <input type="checkbox"/> |
| <i>Obstetrics and Gynaecology</i> | <input type="checkbox"/> | <i>Surgery</i>       | <input type="checkbox"/> |
| <i>Paediatrics</i>                | <input type="checkbox"/> | <i>Uncertain</i>     | <input type="checkbox"/> |

*Other (please write):* \_\_\_\_\_

### About you generally

13. What is your age? \_\_\_\_\_

14. What is your gender? \_\_\_\_\_

15. How would you describe your religious beliefs?

*None / Buddhist / Catholic / Hindu / Jewish / Muslim / Protestant / Sikh / Other* \_\_\_\_\_

16. Please feel free to give further comments on abortion education at UCLMS and/or on this

study:

**Thank you for completing this anonymous survey**

The questionnaire asks some potentially sensitive questions. If completing it raises any issues you would like to talk about with somebody, you can contact Medical Student Support [medsch.student-support@ucl.ac.uk](mailto:medsch.student-support@ucl.ac.uk) or UCL Student Psychological Services: [gnandagopak@ucl.ac.uk](mailto:gnandagopak@ucl.ac.uk); 3 Taviton Street, London, WC1E 6BT; [http://www.ucl.ac.uk/student-psychological-services/index\\_home](http://www.ucl.ac.uk/student-psychological-services/index_home)
